# Supplementary material for: Universal synthesis strategy for preparation of transition metal oxide electrocatalysts doped with noble metal single atoms for oxygen evolution reaction
Source: Royal Society of Chemistry journal article supplement (doi:10.1039/d4ya00238e), 2024-01-01
Supplement: d4ya00238e1.pdf [file d4ya00238e1.pdf]

## Supporting Information

### Universal synthesis strategy for preparation of transition metal oxide electrocatalysts doped with noble metal single atoms for oxygen evolution reaction

Jingyao Wang, Yiming Zhu, Xuepeng Zhong, Zhiwei Hu, Wei-Hsiang Huang, Chih-Wen Pao, Hongfei Cheng\*, Nicolas Alonso-Vante\*, and Jiwei Ma\*

#### Figures:

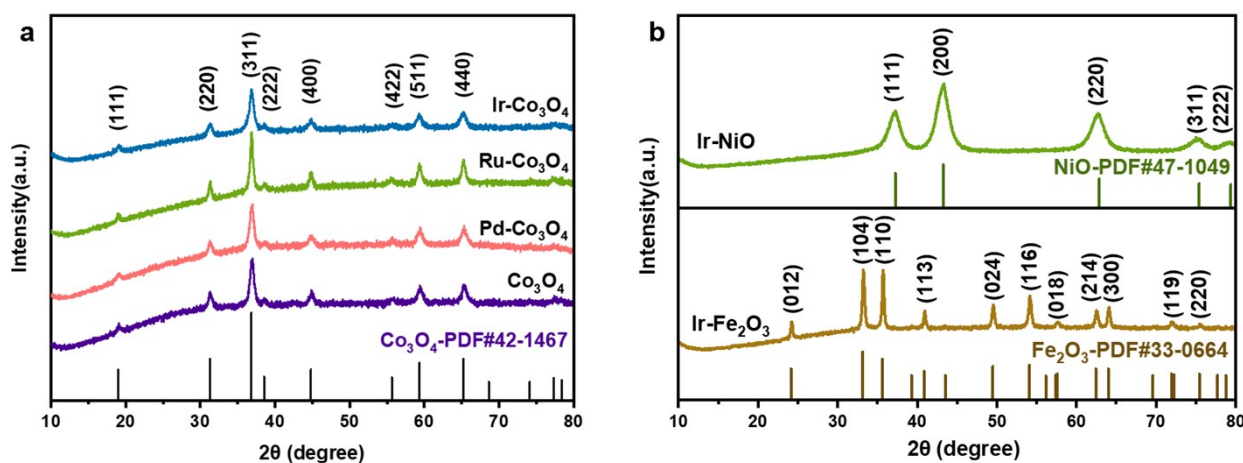

**Figure S1.** X-ray diffraction (XRD) patterns of (a) Ir-Co<sub>3</sub>O<sub>4</sub>, Ru-Co<sub>3</sub>O<sub>4</sub>, Pd-Co<sub>3</sub>O<sub>4</sub>, and Co<sub>3</sub>O<sub>4</sub>. (b) Ir-NiO, and Ir-Fe<sub>2</sub>O<sub>3</sub>.

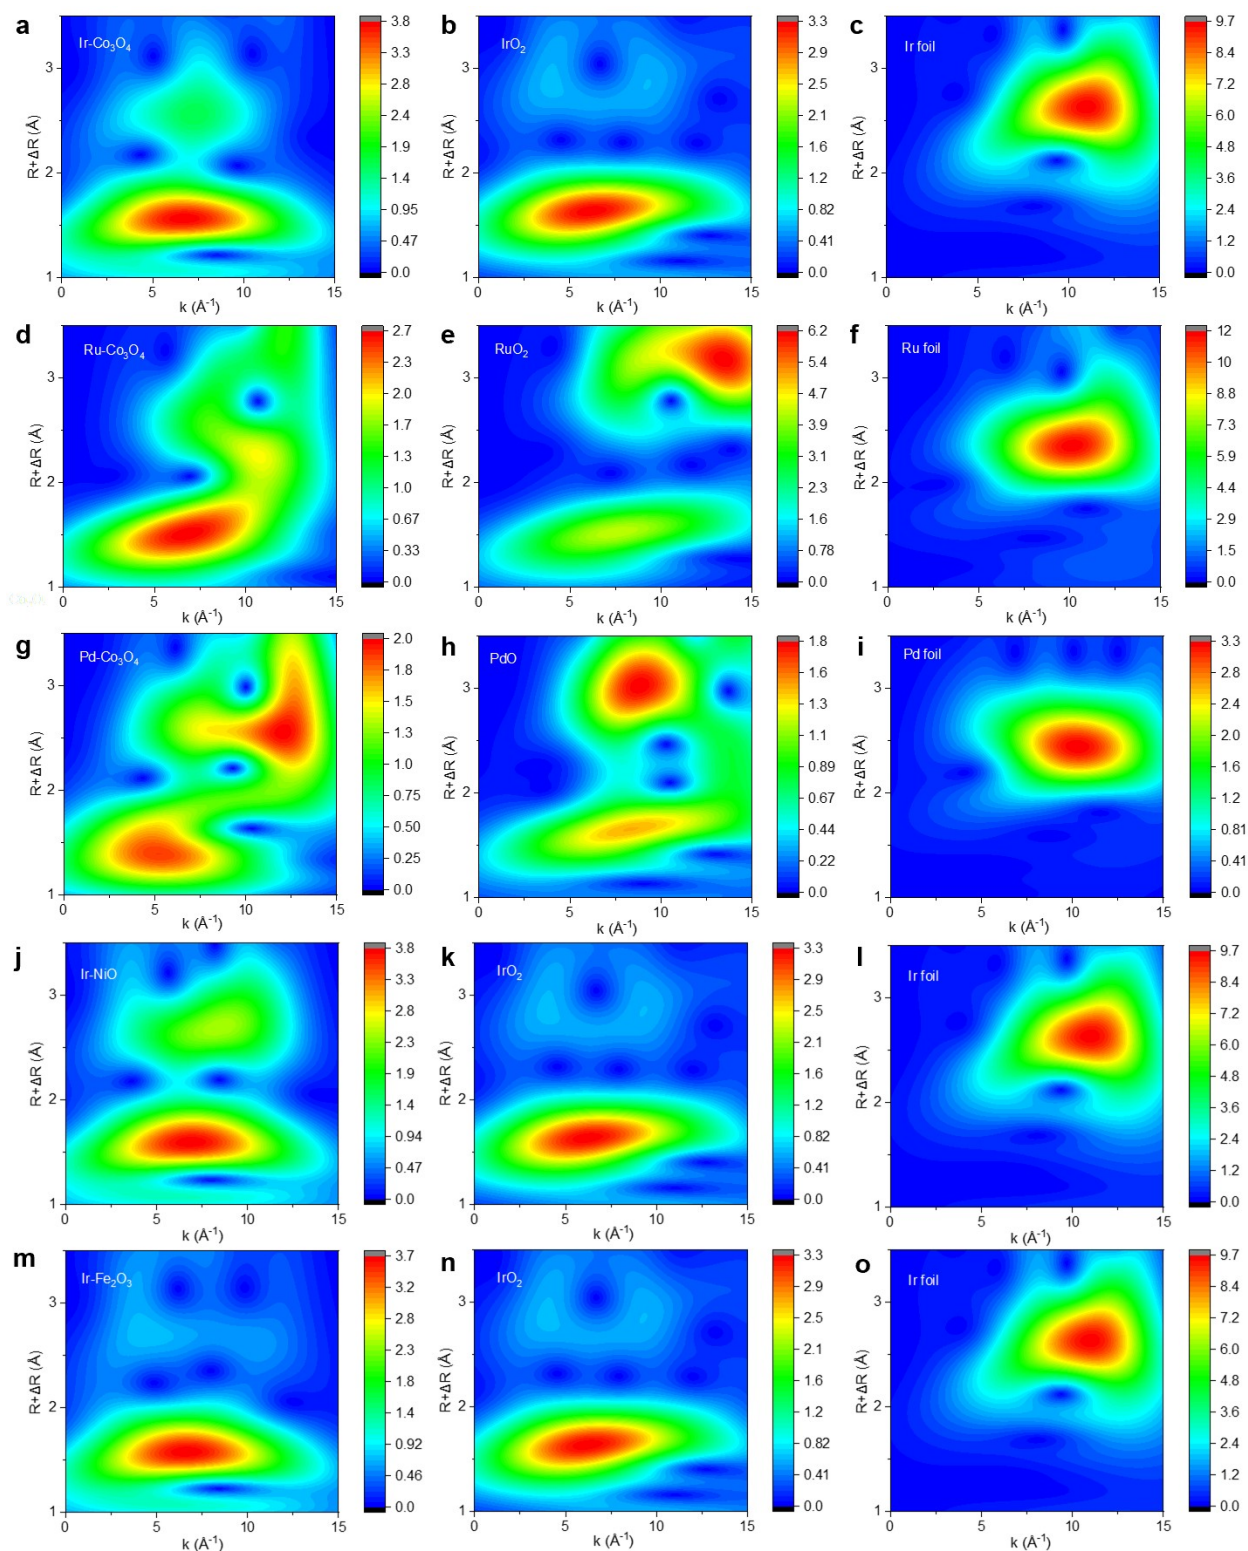

**Figure S2.** The wavelet transforms for the  $k^3$ -weighted EXAFS signals of (a-c) Ir- $\text{Co}_3\text{O}_4$ ,  $\text{IrO}_2$ , and Ir foil. (d-f) Ru- $\text{Co}_3\text{O}_4$ ,  $\text{RuO}_2$ , and Ru foil. (g-i) Pd- $\text{Co}_3\text{O}_4$ , PdO, and Pd foil. (j-l) Ir-NiO,  $\text{IrO}_2$ , and Ir foil. (m-o) Ir- $\text{Fe}_2\text{O}_3$ ,  $\text{IrO}_2$ , and Ir foil.

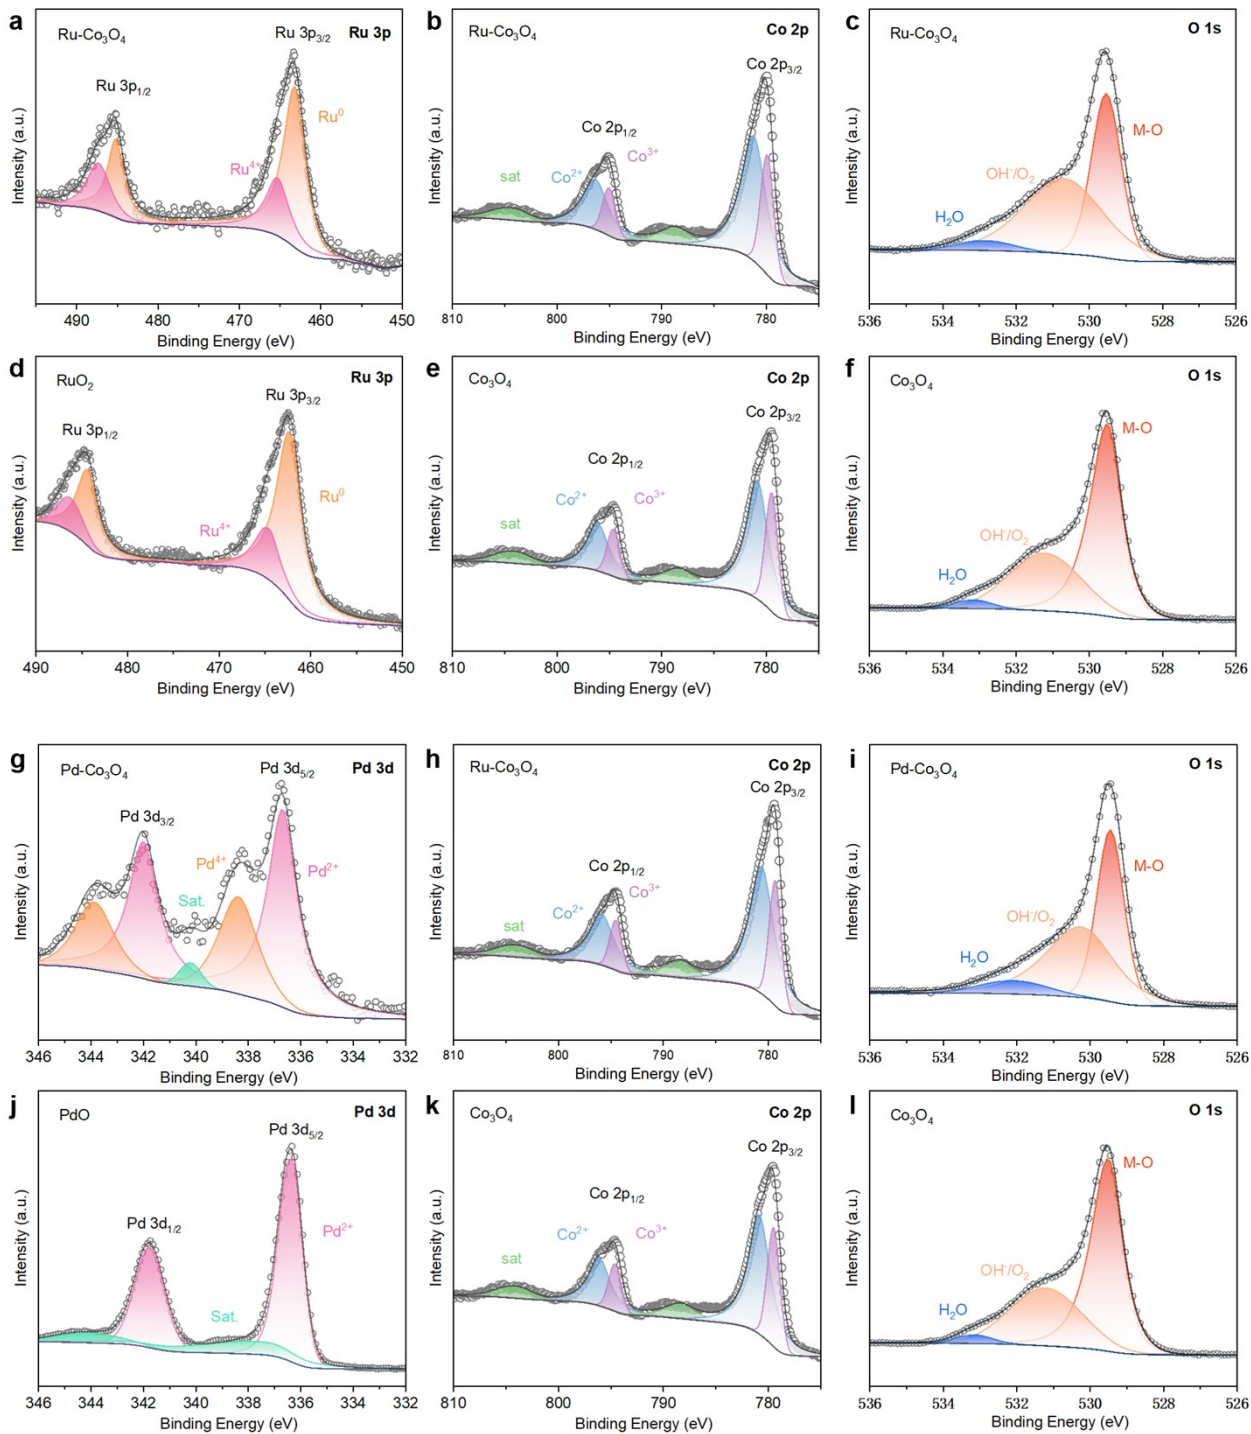

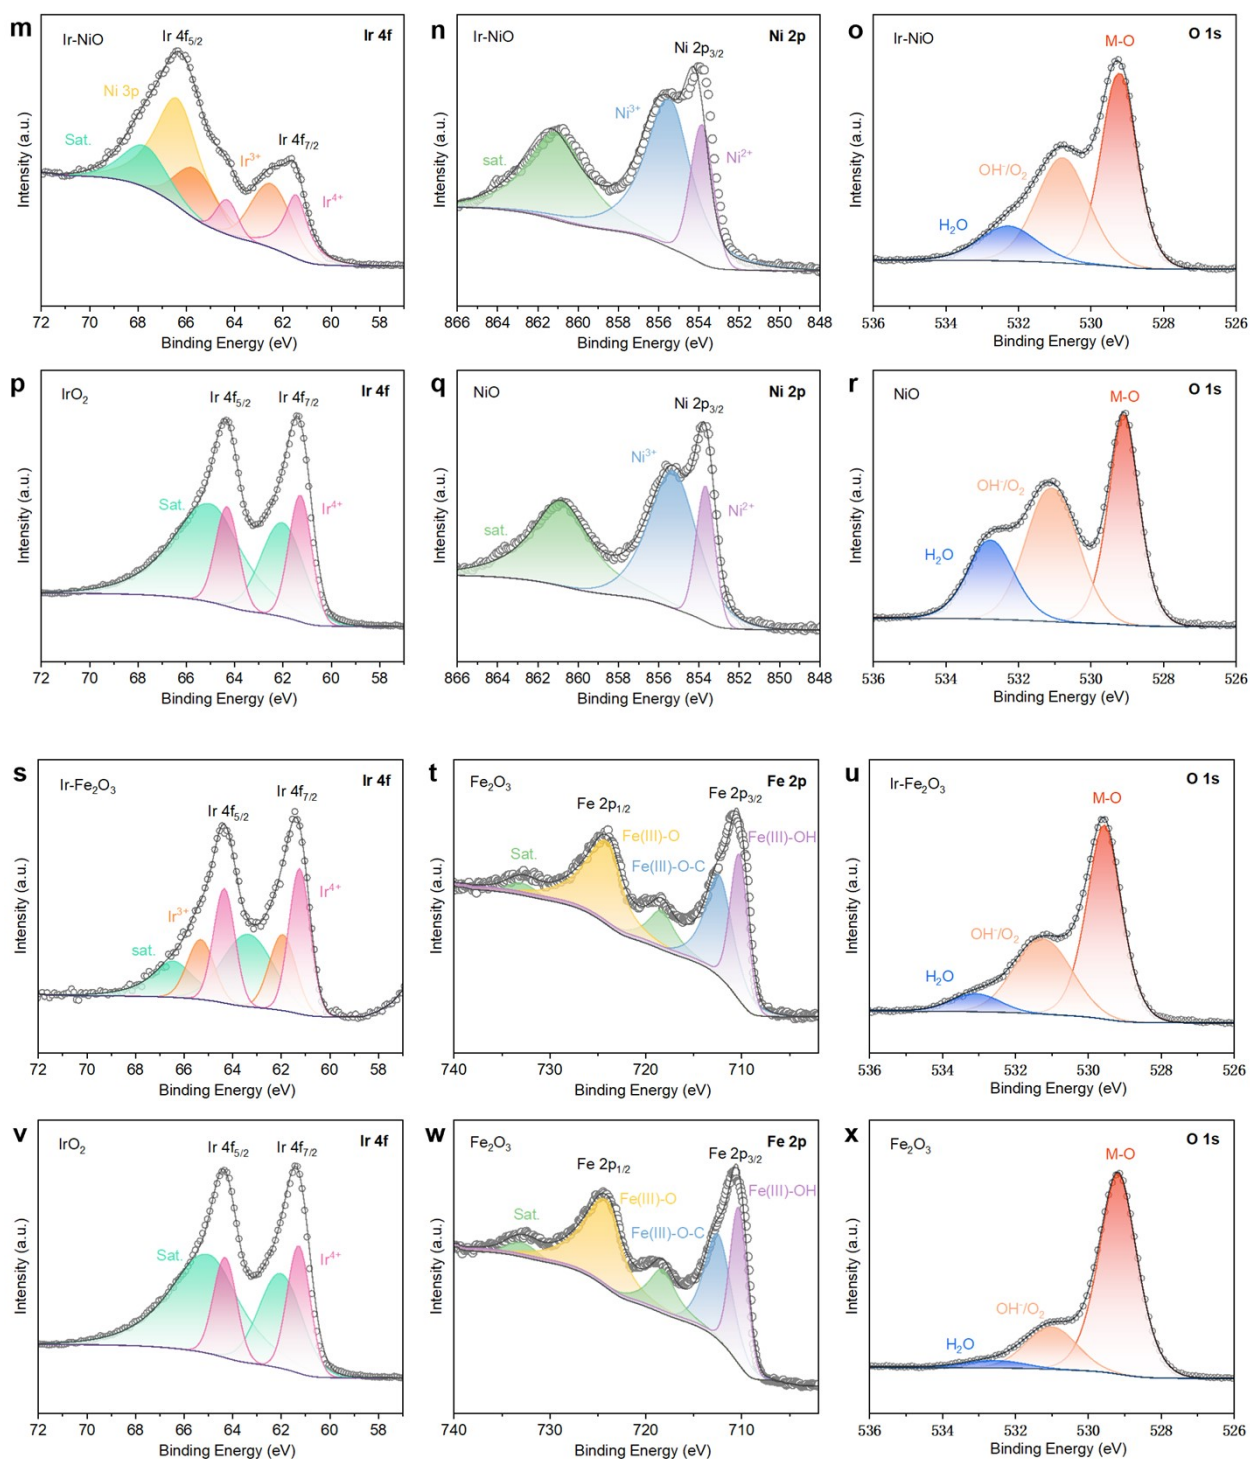

**Figure S3.** Photoemission lines: (a, d) Ru  $3p$  of Ru- $\text{Co}_3\text{O}_4$  and Ru $_2\text{O}_3$ . (b, e) Co  $2p$  and (c, f) O  $1s$  of Ru- $\text{Co}_3\text{O}_4$  and  $\text{Co}_3\text{O}_4$ . (g, j) Pd  $3d$  of Pd- $\text{Co}_3\text{O}_4$ , and PdO. (h, k) Co  $2p$ , and (i, l) O  $1s$  of Pd- $\text{Co}_3\text{O}_4$  and  $\text{Co}_3\text{O}_4$ . (m, p) Ir  $4f$  of Ir-NiO, and Ir $_2\text{O}_3$ . (n, q) Ni  $2p$ , and (o, r) O  $1s$  of Ir-NiO, and NiO. (s, v) Ir  $4f$  of Ir- $\text{Fe}_2\text{O}_3$ , and Ir $_2\text{O}_3$ . (t, w) Fe  $2p$ , and (u, x) O  $1s$  of Ir- $\text{Fe}_2\text{O}_3$ , and  $\text{Fe}_2\text{O}_3$ .

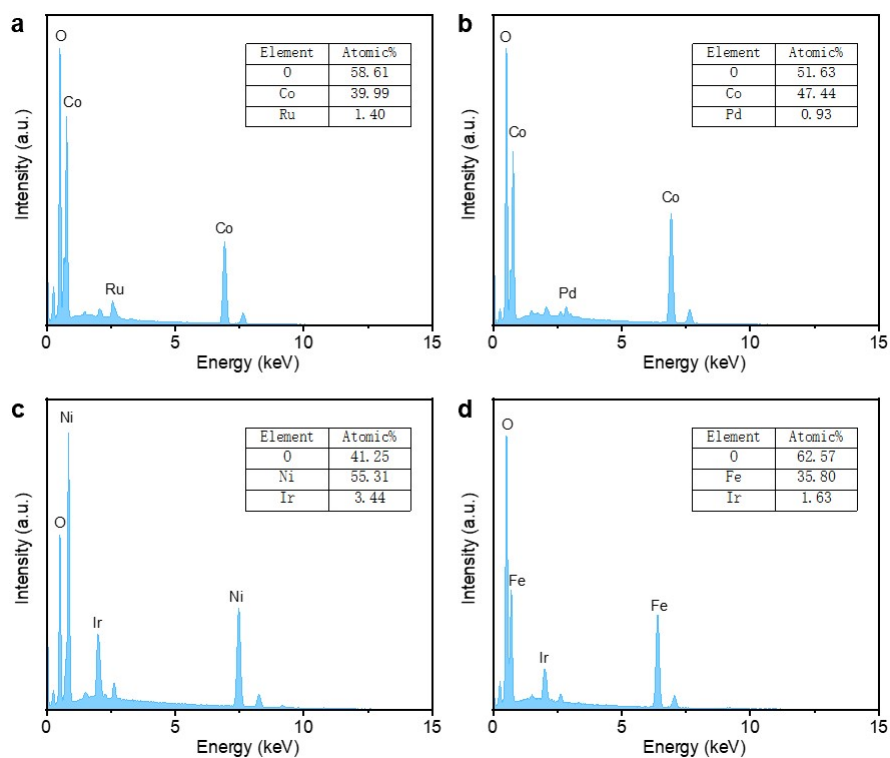

**Figure S4.** SEM-EDS spectra of (a) Ru-Co<sub>3</sub>O<sub>4</sub>, (b) Pd-Co<sub>3</sub>O<sub>4</sub>, (c) Ir-NiO, and (d) Ir-Fe<sub>2</sub>O<sub>3</sub>.

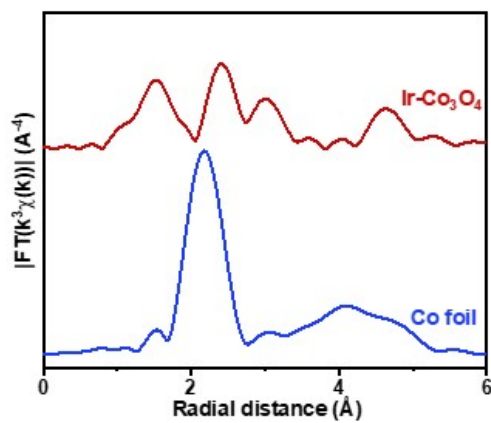

**Figure S5.** Co-K edge EXAFS spectra of Ir-Co<sub>3</sub>O<sub>4</sub> and Co foil.

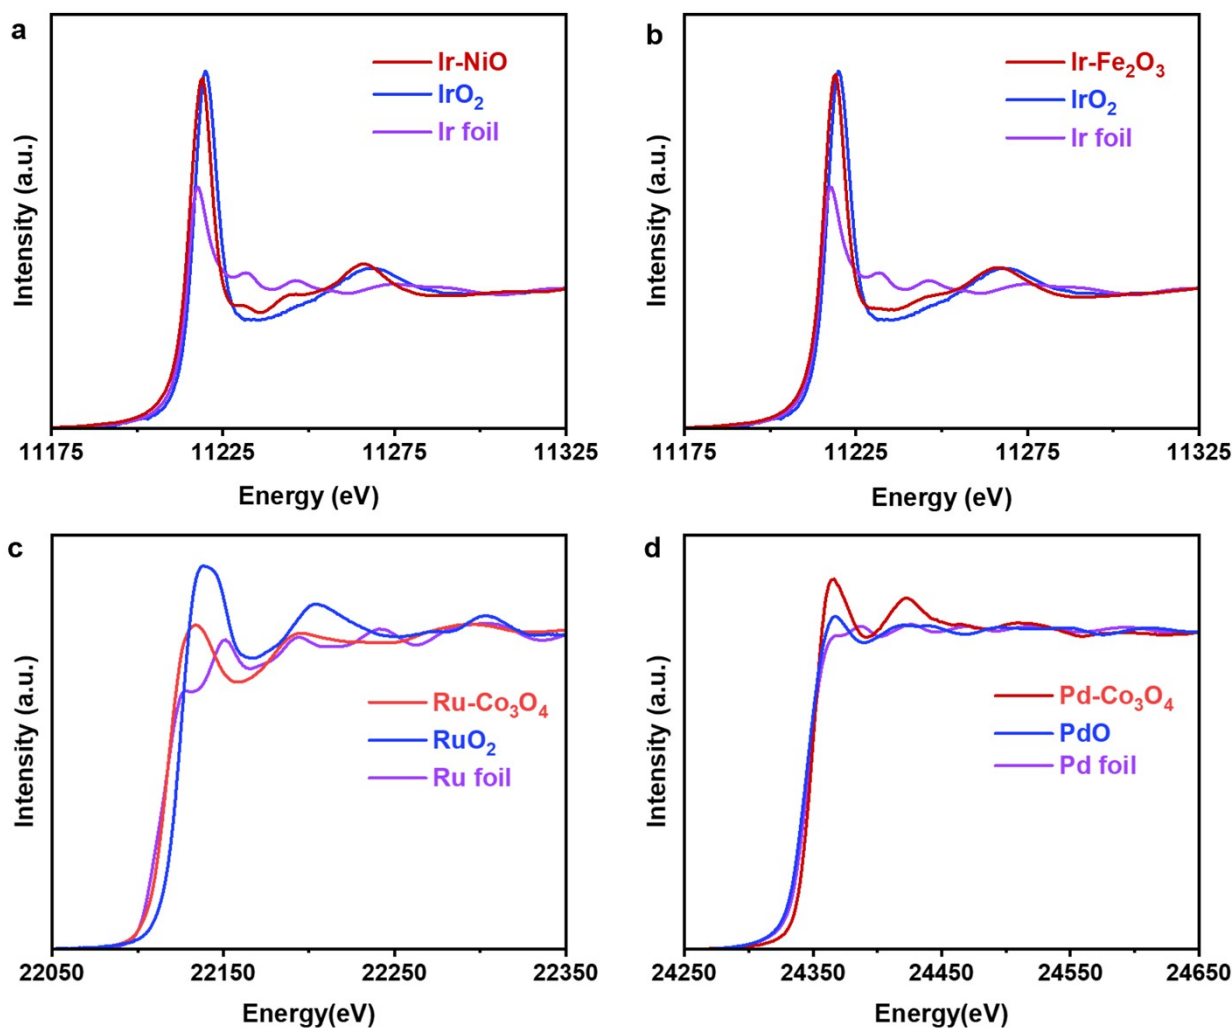

**Figure S6.** The normalized Ir-L<sub>3</sub> edge XANES spectra of (a) Ir-NiO, Ir foil, and IrO<sub>2</sub>. (b) Ir-Fe<sub>2</sub>O<sub>3</sub>, Ir foil, and IrO<sub>2</sub>. (c) The normalized Ru-K edge XANES spectra of Ru-Co<sub>3</sub>O<sub>4</sub>, Ru foil, and RuO<sub>2</sub>. (d) The normalized Pd-K edge XANES spectra of Pd-Co<sub>3</sub>O<sub>4</sub>, Pd foil, and PdO.

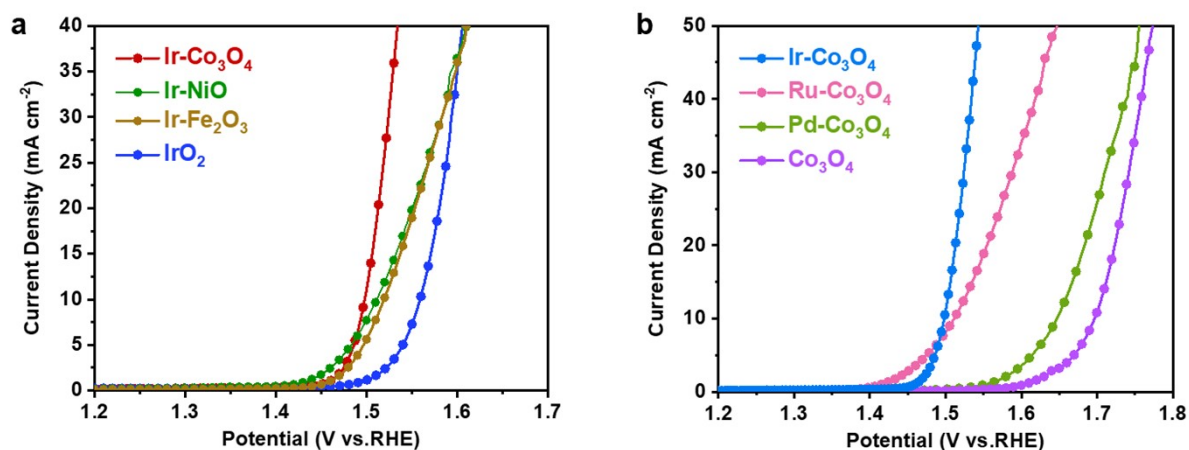

**Figure S7.** LSV curves of (a) Ir-Co<sub>3</sub>O<sub>4</sub>, Ir-NiO, Ir-Fe<sub>2</sub>O<sub>3</sub>, and IrO<sub>2</sub>, (b) Ir-Co<sub>3</sub>O<sub>4</sub>, Ru-Co<sub>3</sub>O<sub>4</sub>, Pd-Co<sub>3</sub>O<sub>4</sub>, and Co<sub>3</sub>O<sub>4</sub> collected at a scanning rate of 5 mV s<sup>-1</sup> in 0.5 M H<sub>2</sub>SO<sub>4</sub> solution.

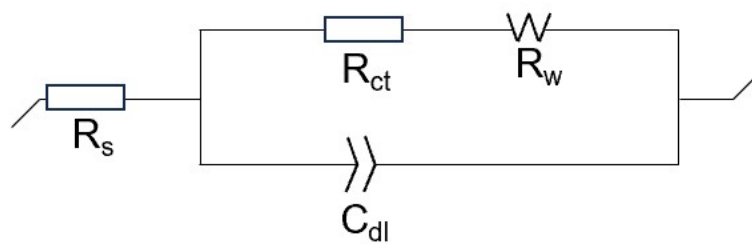

**Figure S8.** The equivalent circuit section applied in the EIS testing of the catalysts. Electrolyte, Charge transfer, and Warburg resistance are  $R_s$ ,  $R_{ct}$ , and  $R_w$ , respectively. The double layer capacitance is  $C_{dl}$ .

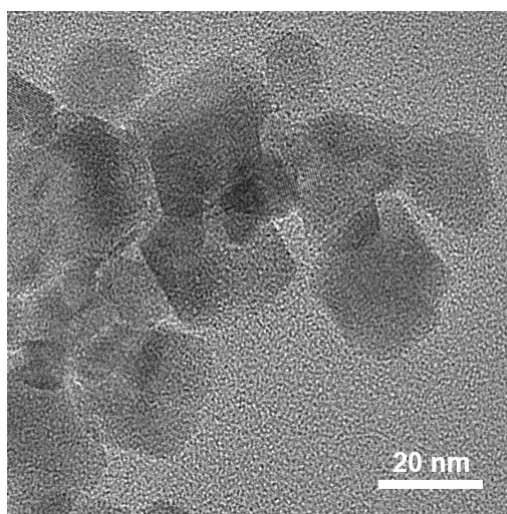

**Figure S9.** TEM image of  $\text{Co}_3\text{O}_4$ .

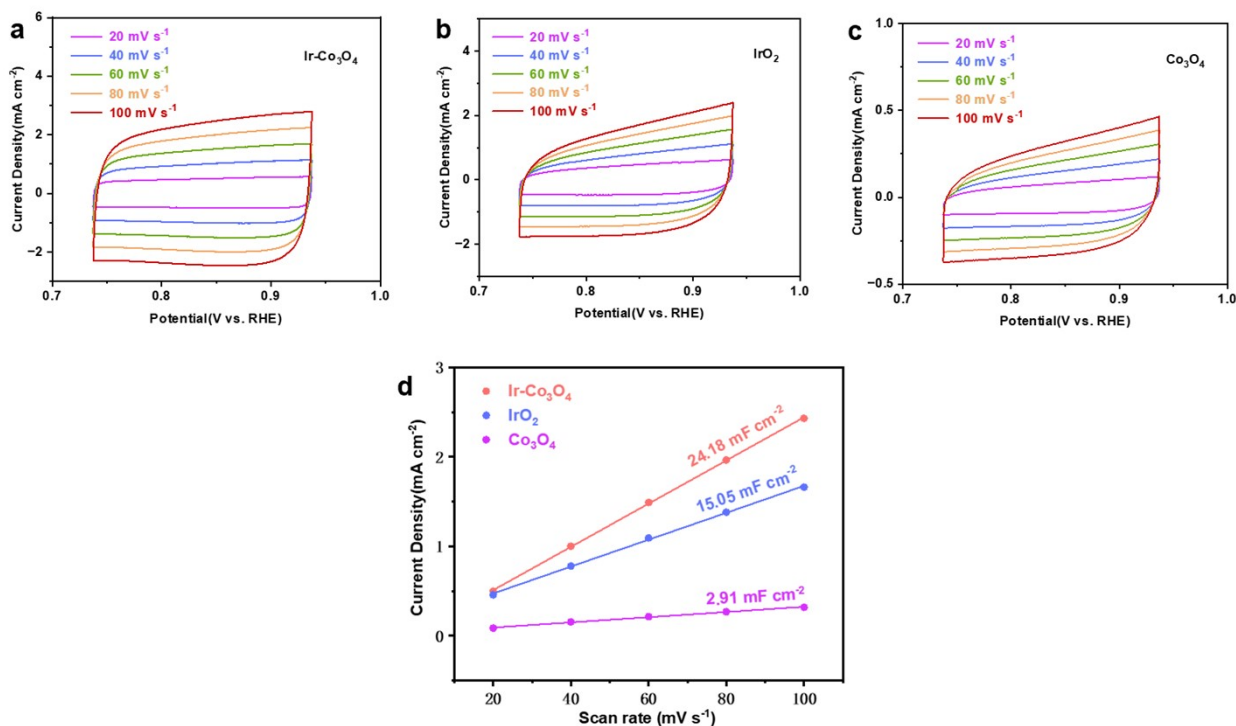

**Figure S10.** Electrochemical cyclic voltammetry scans were recorded for (a) Ir-Co<sub>3</sub>O<sub>4</sub>, (b) IrO<sub>2</sub>, and (c) Co<sub>3</sub>O<sub>4</sub>. Scan rates are 20, 40, 60, 80 and 100 mV s<sup>-1</sup>. (d) Linear fitting of the capacitive currents versus cyclic voltammetry scan rates for these catalysts.

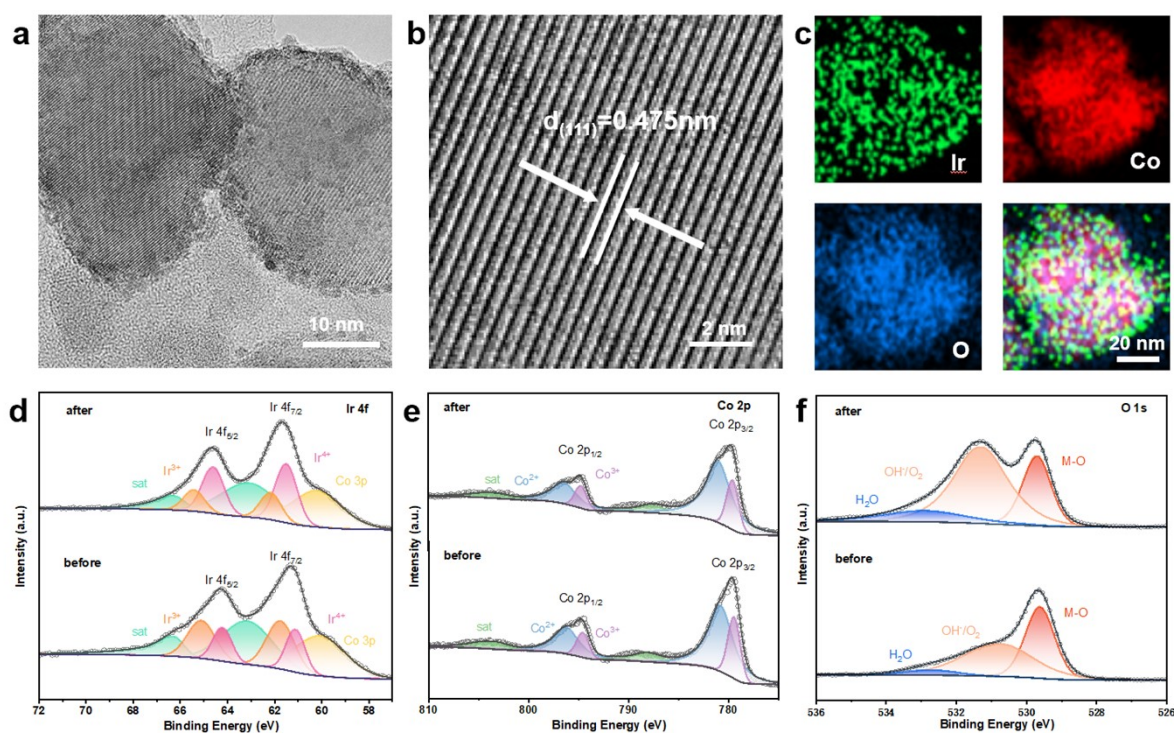

**Figure S11.** (a) TEM image, (b) HR-TEM image, (c) EDS elemental mappings of Ir-Co<sub>3</sub>O<sub>4</sub> after stability test. (d) Ir 4f, (e) Co 2p, (f) O1s XPS spectrum of Ir-Co<sub>3</sub>O<sub>4</sub> before and after stability test.



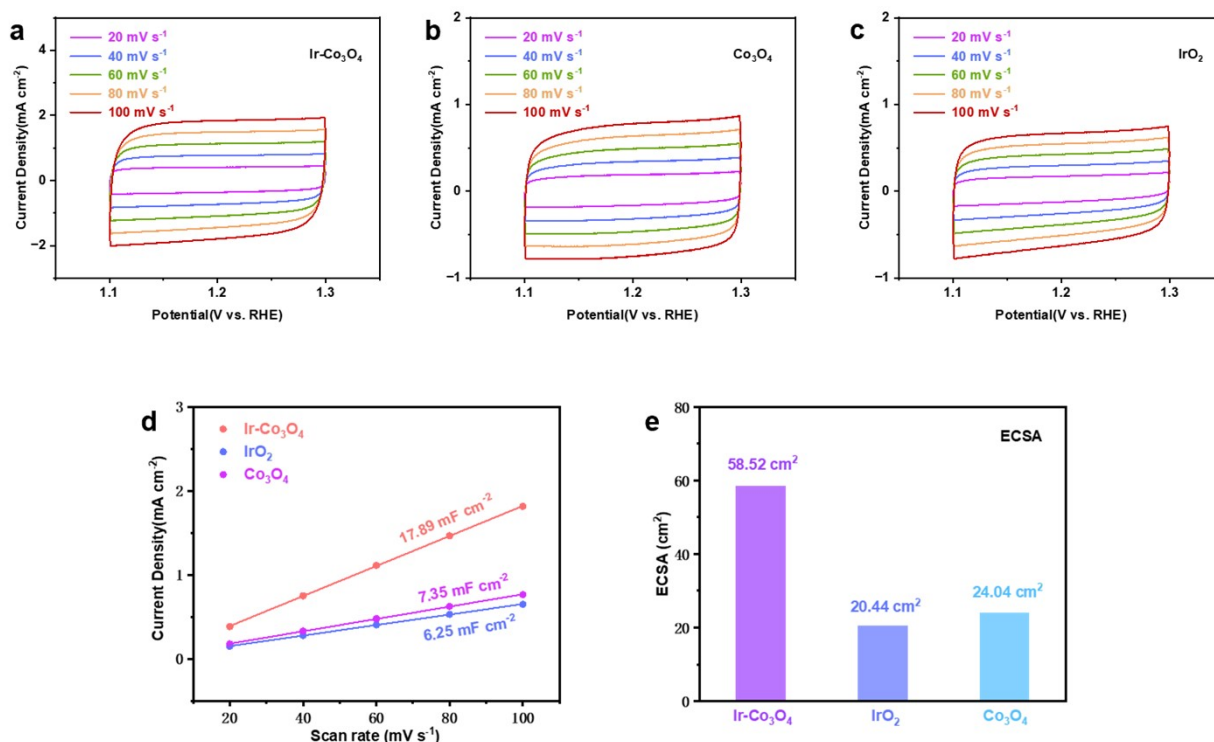

**Figure S12.** Electrochemical cyclic voltammograms were recorded for (a) Ir-Co<sub>3</sub>O<sub>4</sub>, (b) Co<sub>3</sub>O<sub>4</sub>, and (c) IrO<sub>2</sub>. Scan rates are 20, 40, 60, 80, and 100 mV s<sup>-1</sup>. (d) Linear fitting of the capacitive currents versus cyclic voltammogram scan rates for these catalysts. (e) The calculated ECSA values for Ir-Co<sub>3</sub>O<sub>4</sub>, IrO<sub>2</sub>, and Co<sub>3</sub>O<sub>4</sub> in 1.0 M KOH.

### Tables:

**Table S1.** Fit goodness and R-factor of XRD refinements for Ir-Co<sub>3</sub>O<sub>4</sub> and Co<sub>3</sub>O<sub>4</sub>.

| Compounds                         | R <sub>F</sub> | R <sub>B</sub> | R <sub>P</sub> | R <sub>WP</sub> | χ <sup>2</sup> |
|-----------------------------------|----------------|----------------|----------------|-----------------|----------------|
| Ir-Co <sub>3</sub> O <sub>4</sub> | 0.309%         | 0.314%         | 0.286%         | 0.462%          | 3.46           |
| Co <sub>3</sub> O <sub>4</sub>    | 0.816%         | 0.598%         | 0.228%         | 0.293%          | 1.64           |

**Table S2.** Results of XRD refinements for Ir-Co<sub>3</sub>O<sub>4</sub> and Co<sub>3</sub>O<sub>4</sub>.

| Compounds                         | <i>a</i> (Å) | <i>b</i> (Å) | <i>c</i> (Å) | <i>V</i> (Å <sup>3</sup> ) |
|-----------------------------------|--------------|--------------|--------------|----------------------------|
| Ir-Co <sub>3</sub> O <sub>4</sub> | 8.102        | 8.102        | 8.102        | 531.9                      |
| Co <sub>3</sub> O <sub>4</sub>    | 8.086        | 8.086        | 8.086        | 528.7                      |

**Table S3.** XPS quantification data for all elements in Ir-Co<sub>3</sub>O<sub>4</sub>, Ru-Co<sub>3</sub>O<sub>4</sub>, Pd-Co<sub>3</sub>O<sub>4</sub>, Ir-NiO, and Ir-Fe<sub>2</sub>O<sub>3</sub>.

| Compounds                         | Element | Atomic% |
|-----------------------------------|---------|---------|
| Ir-Co <sub>3</sub> O <sub>4</sub> | Ir      | 1.86    |
|                                   | Co      | 28.44   |
|                                   | O       | 69.70   |
| Ru-Co <sub>3</sub> O <sub>4</sub> | Ru      | 1.41    |
|                                   | Co      | 21.24   |
|                                   | O       | 77.35   |
| Pd-Co <sub>3</sub> O <sub>4</sub> | Pd      | 1.18    |
|                                   | Co      | 31.65   |
|                                   | O       | 67.17   |
| Ir-NiO                            | Ir      | 0.75    |
|                                   | Ni      | 41.66   |
|                                   | O       | 57.58   |
| Ir-Fe <sub>2</sub> O <sub>3</sub> | Ir      | 1.39    |
|                                   | Fe      | 26.06   |
|                                   | O       | 72.55   |

**Table S4.** Fitting parameters of EIS for Ir-Co<sub>3</sub>O<sub>4</sub>, IrO<sub>2</sub>, and Co<sub>3</sub>O<sub>4</sub> in 0.5 M H<sub>2</sub>SO<sub>4</sub>.

| Samples                           | R <sub>s</sub> (Ω) | R <sub>ct</sub> (Ω) | C <sub>dl</sub> (F s <sup>n-1</sup> ) | s (Ω s <sup>-1/2</sup> ) |
|-----------------------------------|--------------------|---------------------|---------------------------------------|--------------------------|
| Ir-Co <sub>3</sub> O <sub>4</sub> | 5.1                | 16.6                | 0.0498                                | 0.0498                   |
| IrO <sub>2</sub>                  | 4.0                | 220.0               | 0.1991                                | 0.0498                   |
| Co <sub>3</sub> O <sub>4</sub>    | 5.1                | 5271.0              | 0.0996                                | 4.5658                   |

**Table S5.** Comparisons of the Tafel slopes and overpotentials at the current density of 10 mA cm<sup>-2</sup> of reported Ir-based catalysts for OER in 0.5 M H<sub>2</sub>SO<sub>4</sub>.

| Catalysts                                   | Overpotential (mV) | Tafel slope (mV dec <sup>-1</sup> ) | Ref.      |
|---------------------------------------------|--------------------|-------------------------------------|-----------|
| Rh <sub>22</sub> Ir <sub>78</sub> alloy NPs | 292                | 101                                 | [1]       |
| Porous carbon-coated IrCo                   | 270                | 71.8                                | [2]       |
| IrO <sub>2</sub> /CNT                       | 293                | 67                                  | [3]       |
| TiN/IrO <sub>2</sub>                        | 313                | 65.5                                | [4]       |
| Ir-SA@Fe@NCNT                               | 250                | 58.2                                | [5]       |
| IrO <sub>2</sub> /GCNa                      | 276                | 57                                  | [6]       |
| Ir <sub>6</sub> Ag <sub>9</sub> nanotubes   | 297                | 60                                  | [7]       |
| Amorphous IrO <sub>x</sub> NSs              | 250                | 47                                  | [8]       |
| Sr <sub>2</sub> IrO <sub>4</sub>            | 287                | 45                                  | [9]       |
| Li-IrO <sub>x</sub>                         | 290                | 39                                  | [10]      |
| Ir-Co <sub>3</sub> O <sub>4</sub>           | 268                | 38                                  | This work |

**Table S6.** Fitting parameters of EIS for Ir-Co<sub>3</sub>O<sub>4</sub>, IrO<sub>2</sub>, and Co<sub>3</sub>O<sub>4</sub> in 1.0 M KOH.

| Samples                           | Rs (Ω) | Rct (Ω) | C <sub>dl</sub> (F s <sup>n-1</sup> ) | s (Ω s <sup>-1/2</sup> ) |
|-----------------------------------|--------|---------|---------------------------------------|--------------------------|
| Ir-Co <sub>3</sub> O <sub>4</sub> | 4.3    | 14.6    | 0.0498                                | 9.6399                   |
| IrO <sub>2</sub>                  | 3.9    | 102.2   | 0.0896                                | 6.2364                   |
| Co <sub>3</sub> O <sub>4</sub>    | 4.0    | 445.3   | 0.0996                                | 0.1216                   |

## References

- [1] H. Guo, Z. Fang, H. Li, D. Fernandez, G. Henkelman, S. M. Humphrey, G. Yu, *ACS Nano* **2019**, 13, 13225.
- [2] X. Sun, F. Liu, X. Chen, C. Li, J. Yu, M. Pan, *Electrochimica Acta* **2019**, 307, 206.
- [3] J. Guan, D. Li, R. Si, S. Miao, F. Zhang, C. Li, *ACS Catalysis* **2017**, 7, 5983.
- [4] H. Zhang, Z. Y. Yuan, B. Li, X. Jin, presented at *the 2019 Chinese Control And Decision Conference (CCDC)*, 3-5 June 2019, **2019**.
- [5] F. Luo, H. Hu, X. Zhao, Z. Yang, Q. Zhang, J. Xu, T. Kaneko, Y. Yoshida, C. Zhu, W. Cai, *Nano Letters* **2020**, 20, 2120.

- [6] J. Chen, P. Cui, G. Zhao, K. Rui, M. Lao, Y. Chen, X. Zheng, Y. Jiang, H. Pan, S. X. Dou, W. Sun, *Angewandte Chemie International Edition* **2019**, 58, 12540.
- [7] M. Zhu, Q. Shao, Y. Qian, X. Huang, *Nano Energy* **2019**, 56, 330.
- [8] B. Jiang, J. Kim, Y. Guo, K. C. W. Wu, S. M. Alshehri, T. Ahamad, N. Alhokbany, J. Henzie, Y. Yamachi, *Catalysis Science & Technology* **2019**, 9, 3697.
- [9] A. L. Strickler, D. Higgins, T. F. Jaramillo, *ACS Applied Energy Materials* **2019**, 2, 5490.
- [10] J. Gao, C.-Q. Xu, S.-F. Hung, W. Liu, W. Cai, Z. Zeng, C. Jia, H. M. Chen, H. Xiao, J. Li, Y. Huang, B. Liu, *Journal of the American Chemical Society* **2019**, 141, 3014.
